# Supplementary material for: Stabilization of zwitterionic aryltrifluoroborates against hydrolysis
Source: Royal Society of Chemistry journal article supplement (doi:10.1039/c0cc02117b), 2010-01-01
Supplement: c0cc02117b.pdf [file c0cc02117b.pdf]

## Stabilization of zwitterionic aryltrifluoroborates against hydrolysis

Casey R. Wade, Haiyan Zhao, and François P. Gabbaï\*

Department of Chemistry, Texas A&M University, College Station, Texas 77843, USA. E-mail: [francois@tamu.edu](mailto:francois@tamu.edu); Fax: +1 979 845 4719; Tel: +1 979 862 2070

### Supplementary Information

**General Considerations.** 2-bromothioanisole was purchased from TCI America.  $\text{KHF}_2$  was purchased from Alfa Aesar. Solvents were dried by passing through an alumina column (*n*-hexane,  $\text{CH}_2\text{Cl}_2$ ) or refluxing under  $\text{N}_2$  over Na/K ( $\text{Et}_2\text{O}$  and THF). Air-sensitive compounds were handled under a  $\text{N}_2$  atmosphere using standard Schlenk and glovebox techniques. Elemental analyses were performed at Atlantic Microlab (Norcross, GA). NMR spectra were recorded on Varian Unity Inova 400 FT NMR (399.59 MHz for  $^1\text{H}$ , 375.99 MHz for  $^{19}\text{F}$ , 128.19 MHz for  $^{11}\text{B}$ , 100.45 MHz for  $^{13}\text{C}$ , 161.75 MHz for  $^{31}\text{P}$ ) spectrometer at ambient temperature unless otherwise stated. Chemical shifts  $\delta$  are given in ppm, and are referenced against external  $\text{Me}_4\text{Si}$  ( $^1\text{H}$ ,  $^{13}\text{C}$ ),  $\text{BF}_3 \cdot \text{Et}_2\text{O}$  ( $^{11}\text{B}$ ,  $^{19}\text{F}$ ) and  $\text{H}_3\text{PO}_4$  ( $^{31}\text{P}$ ).

**Crystallography.** Single crystals of **1**- $\text{BF}_3$  were obtained by slow evaporation of a solution of the compound in acetonitrile. Single crystals of **2**- $\text{BF}_3$  and **3**- $\text{BF}_3$  were obtained by slow evaporation of solutions of the compounds in acetonitrile/ $\text{H}_2\text{O}$  (5/1). The crystallographic measurement of **1**- $\text{BF}_3$ , **2**- $\text{BF}_3$ , and **3**- $\text{BF}_3$  were performed using a Bruker APEX-II CCD area detector diffractometer, with a graphite-monochromated  $\text{Mo-K}\alpha$  radiation ( $\lambda = 0.71069 \text{ \AA}$ ). A specimen of suitable size and quality was selected and mounted onto a nylon loop. The structure was solved by direct methods, which successfully located most of the non-hydrogen atoms. Subsequent refinement on  $F^2$  using

the SHELXTL/PC package (version 6.10) allowed location of the remaining non-hydrogen atoms. The crystal data are included in Table S1.

**Table S1.** Crystal data

| Crystal data                                      | <b>1</b>                                         | <b>2</b>                                          | <b>3</b>                                         |
|---------------------------------------------------|--------------------------------------------------|---------------------------------------------------|--------------------------------------------------|
| Formula                                           | C <sub>9</sub> H <sub>13</sub> BF <sub>3</sub> N | C <sub>19</sub> H <sub>17</sub> BF <sub>3</sub> P | C <sub>8</sub> H <sub>10</sub> BF <sub>3</sub> S |
| Mr                                                | 203.02                                           | 344.11                                            | 206.03                                           |
| Crystal size/mm                                   | 0.20 x 0.20 x 0.16                               | 0.27 x 0.12 x 0.08                                | 0.15 x 0.12 x 0.11                               |
| Crystal system                                    | Monoclinic                                       | Triclinic                                         | Monoclinic                                       |
| Space group                                       | P2(1)/c                                          | P-1                                               | P2(1)/n                                          |
| <i>a</i> /Å                                       | 7.0647(2)                                        | 11.6184(6)                                        | 6.6172(5)                                        |
| <i>b</i> /Å                                       | 13.0809(3)                                       | 12.0740(6)                                        | 12.6622(9)                                       |
| <i>c</i> /Å                                       | 10.1994(2)                                       | 12.6108(7)                                        | 11.2891(8)                                       |
| $\alpha$ /°                                       | 90                                               | 108.737(3)                                        | 90                                               |
| $\beta$ /°                                        | 95.349(1)                                        | 94.921(4)                                         | 102.918(1)                                       |
| $\gamma$ /°                                       | 90                                               | 90.944(3)                                         | 90                                               |
| <i>V</i> /Å <sup>3</sup>                          | 938.45(4)                                        | 1667.30(15)                                       | 921.95(12)                                       |
| <i>Z</i>                                          | 4                                                | 4                                                 | 4                                                |
| $\rho_{\text{calc}}$ /g cm <sup>-3</sup>          | 1.437                                            | 1.371                                             | 1.484                                            |
| $\mu$ /mm <sup>-1</sup>                           | 0.125                                            | 0.192                                             | 0.343                                            |
| F(000)                                            | 424                                              | 712                                               | 424                                              |
| T/K                                               | 110(2)                                           | 110(2)                                            | 110(2)                                           |
| Scan mode                                         | $\omega$ , $\phi$                                | $\omega$ , $\phi$                                 | $\omega$ , $\phi$                                |
| <i>hkl</i> Range                                  | -10 → +10<br>-19 → +18<br>-15 → +15              | -13 → +13<br>-14 → +14<br>-14 → +14               | -7 → +8<br>-15 → +15<br>-13 → +13                |
| Measd reflns                                      | 9940                                             | 27166                                             | 9052                                             |
| Unique reflns [Rint]                              | 3254 [0.0303]                                    | 5847 [0.0758]                                     | 1709 [0.0302]                                    |
| Reflns used for refinement                        | 3254                                             | 5847                                              | 1709                                             |
| Refined parameters                                | 127                                              | 433                                               | 118                                              |
| GooF                                              | 1.000                                            | 1.001                                             | 1.002                                            |
| R1, <sup>a</sup> wR2 <sup>b</sup> (all data)      | 0.0491, 0.0993                                   | 0.0981, 0.2021                                    | 0.0283, 0.0632                                   |
| $\rho_{\text{fin}}$ (max., min.)/eÅ <sup>-3</sup> | 0.380, -0.220                                    | 0.780, -0.611                                     | 0.356, -0.2237                                   |

<sup>a</sup>R1 =  $\sum ||F_o| - |F_c|| / \sum |F_o|$ ; <sup>b</sup>wR2 =  $(\sum w(F_o^2 - F_c^2)^2) / (\sum w(F_o^2)^2)^{1/2}$ ;  $w = 1/[\sigma^2(F_o^2) + (ap)^2 + bp]$ ;  $p = (F_o^2 + 2F_c^2)/3$  with  $a = 0.0563$  for **1**, 0.0300 for **2**, and 0.0240 for **3**; and  $b = 0$  for **1**, 8.5 for **2**, and 0.671 for **3**.

### Preparation of *ortho*-(Me<sub>3</sub>N)C<sub>6</sub>H<sub>4</sub>(BF<sub>3</sub>) (1)

A solution of boronic acid *ortho*-(Me<sub>2</sub>N)C<sub>6</sub>H<sub>4</sub>(B(OH)<sub>2</sub>)<sup>1</sup> (0.725 g, 4.39 mmol) and pinacol (0.570 g, 4.83 mmol) in CH<sub>2</sub>Cl<sub>2</sub> (10 mL) was stirred for 3 hrs over anhydrous MgSO<sub>4</sub>. The solution was filtered and the solvent removed *in vacuo* to yield the pinacol borane *o*-(Me<sub>2</sub>N)C<sub>6</sub>H<sub>4</sub>(BPin<sub>2</sub>) in 79 % yield (0.860 g). <sup>1</sup>H NMR (399.9 MHz, CDCl<sub>3</sub>): δ 1.35 (s, 12H, pinacol-CH<sub>3</sub>), 2.86 (s, 6H, N-CH<sub>3</sub>), 6.80-6.85 (m, 2H, Ph-CH), 7.30 (ddd, 1H, Ph-CH, <sup>3</sup>J<sub>H-H</sub> = 8.24, 7.14 Hz, <sup>4</sup>J<sub>H-H</sub> = 1.83 Hz), 7.63 (dd, 1H, Ph-CH, <sup>3</sup>J<sub>H-H</sub> = 7.33 Hz, <sup>4</sup>J<sub>H-H</sub> = 1.83 Hz). <sup>11</sup>B NMR (128.2 MHz, CDCl<sub>3</sub>): δ 32.4. The reaction of *o*-(Me<sub>2</sub>N)C<sub>6</sub>H<sub>4</sub>(BPin<sub>2</sub>) (0.284 g, 1.15 mmol) with 2 eq. of methyl triflate (0.26 mL) in Et<sub>2</sub>O (10 mL) led to the immediate precipitation of a white solid, which was filtered and washed with 3 × 5 mL Et<sub>2</sub>O to yield the ammonium triflate [*o*-(Me<sub>2</sub>N)C<sub>6</sub>H<sub>4</sub>(BPin<sub>2</sub>)]OTf in 65% yield (0.308 g). <sup>1</sup>H NMR (399.9 MHz, CDCl<sub>3</sub>): δ 1.38 (s, 12H, pinacol-CH<sub>3</sub>), 3.83 (s, 9H, N-CH<sub>3</sub>), 7.50 (t, 1H, Ph-CH, <sup>3</sup>J<sub>H-H</sub> = 7.33 Hz), 7.67 (t, 1H, Ph-CH, <sup>3</sup>J<sub>H-H</sub> = 8.43 Hz), 7.85 (d, 1H, Ph-CH, <sup>3</sup>J<sub>H-H</sub> = 8.43 Hz), 7.98 (d, 1H, Ph-CH, <sup>3</sup>J<sub>H-H</sub> = 7.33 Hz). <sup>13</sup>C NMR (100.5 MHz, CDCl<sub>3</sub>): δ 24.61, 57.54, 85.89, 119.72, 122.27, 129.88, 133.30, 139.14, 150.60. <sup>11</sup>B NMR (128.2 MHz, CDCl<sub>3</sub>): δ 31.50. Anal. Calcd for C<sub>16</sub>H<sub>25</sub>BNO<sub>5</sub>F<sub>3</sub>S: C, 46.73; H, 6.31; N, 3.41. Found: C, 47.00; H, 6.03; N, 3.45. A solution of the ammonium triflate [*o*-(Me<sub>2</sub>N)C<sub>6</sub>H<sub>4</sub>(BPin<sub>2</sub>)]OTf in MeOH (1 mL) was treated with KHF<sub>2</sub> (0.038 g, 0.48 mmol) in H<sub>2</sub>O (1 mL). The solution was sonicated for 15 minutes and the precipitate collected by filtration. The solid was then extracted with 5 mL hot acetonitrile, the solution was filtered over Celite, and the solvent removed *in vacuo* to yield 0.023 g (93 % yield) of *ortho*-(Me<sub>3</sub>N)C<sub>6</sub>H<sub>4</sub>(BF<sub>3</sub>). <sup>1</sup>H NMR (399.9 MHz, CD<sub>3</sub>CN): δ 3.63 (s, 9H, N-CH<sub>3</sub>), 7.33 (ddd, 1H, Ph-CH, <sup>3</sup>J<sub>H-H</sub> = 8.35 Hz, 7.17 Hz, <sup>4</sup>J<sub>H-H</sub> =

2.04 Hz), 7.39 (t, 1H, Ph-CH,  $^3J_{\text{H-H}} = 7.16$  Hz), 7.55 (d, 1H, Ph-CH,  $^3J_{\text{H-H}} = 8.31$  Hz), 7.97 (d, 1H, Ph-CH,  $^3J_{\text{H-H}} = 5.31$  Hz).  $^{13}\text{C}$  NMR (100.5 MHz,  $\text{CD}_3\text{CN}$ ):  $\delta$  57.8 q, (pseudo-q,  $^3J_{\text{H-F}} = 3.90$  Hz), 128.46, 129.62, 139.72 (q,  $^3J_{\text{H-F}} = 4.32$  Hz), 151.17.  $^{11}\text{B}$  NMR (128.2 MHz,  $\text{CD}_3\text{CN}$ ):  $\delta$  3.2 (q,  $^1J_{\text{B-F}} = 45.5$  Hz).  $^{19}\text{F}$  NMR (375.97 MHz,  $\text{CD}_3\text{CN}$ ):  $\delta$  -131.5 (q,  $^1J_{\text{B-F}} = 45.5$  Hz). Anal. Calcd for  $\text{C}_9\text{H}_{13}\text{BNF}_3$ : C, 53.25; H, 6.45; N, 6.90. Found: C, 53.18; H, 6.59; N, 6.90.

### Preparation of *ortho*-(Ph<sub>2</sub>MeP)C<sub>6</sub>H<sub>4</sub>(BF<sub>3</sub>) (2)

The pinacol borane *ortho*-(Ph<sub>2</sub>P)C<sub>6</sub>H<sub>4</sub>(Bpin)<sup>2</sup> (0.175 g, 0.451 mmol) was treated with 2 eq. of MeOTf (0.10 mL) in Et<sub>2</sub>O (5 mL) leading to the immediate precipitation of a white solid. This white solid was filtered and washed with 3 × 5 mL of Et<sub>2</sub>O. Recrystallization by slow diffusion of Et<sub>2</sub>O into a CH<sub>2</sub>Cl<sub>2</sub> solution (3 mL) yielded [*o*-(Ph<sub>2</sub>MeP)C<sub>6</sub>H<sub>4</sub>(Bpin)]OTf (0.180 g, 72%).  $^1\text{H}$  NMR (399.9 MHz,  $\text{CDCl}_3$ ):  $\delta$  0.96 (s, 12H, pinacol-CH<sub>3</sub>), 3.06 (d, 3H, P-CH<sub>3</sub>,  $^1J_{\text{H-P}} = 13.92$  Hz), 7.11 (dd, 1H, Ph-CH,  $^3J_{\text{H-P}} = 15.7$  Hz,  $^3J_{\text{H-H}} = 7.80$  Hz), 7.54-7.67 (m, 9H, Ph-CH), 7.74 (t, 3H, Ph-CH,  $^3J_{\text{H-H}} = 7.51$  Hz) 8.22 (dd, 1H, Ph-CH,  $^3J_{\text{H-P}} = 7.50$  Hz,  $^3J_{\text{H-H}} = 6.87$  Hz).  $^{13}\text{C}$  NMR (100.5 MHz,  $\text{CDCl}_3$ ):  $\delta$  9.88 (d, P-CH<sub>3</sub>,  $^1J_{\text{C-P}} = 57.22$  Hz), 24.24 (pinacol-CH<sub>3</sub>), 85.28 (pinacol-C-O), 121.07 (d,  $J_{\text{C-P}} = 88.5$  Hz), 123.95 (d,  $J_{\text{C-P}} = 84.7$  Hz), 130.32 (d,  $J_{\text{C-P}} = 13.0$  Hz), 132.13 (d,  $J_{\text{C-P}} = 13.73$  Hz), 132.7 (d,  $J_{\text{C-P}} = 9.9$  Hz), 133.88 (d,  $J_{\text{C-P}} = 3.0$  Hz), 134.55 (d,  $J_{\text{C-P}} = 2.3$  Hz), 136.84 (d,  $J_{\text{C-P}} = 13.0$  Hz), 139.27 ((d,  $J_{\text{C-P}} = 13.7$  Hz), (ipso C for phenylene-C-B not observed).  $^{11}\text{B}$  NMR (128.2 MHz,  $\text{CDCl}_3$ ):  $\delta$  29.72.  $^{31}\text{P}$  NMR (161.75 MHz,  $\text{CDCl}_3$ ):  $\delta$  25.64. Anal. Calcd for  $\text{C}_{26}\text{H}_{29}\text{BO}_5\text{F}_3\text{PS}$ : C, 56.54; H, 5.29. Found: C, 56.29; H, 5.26. The phosphonium triflate [*o*-(Ph<sub>2</sub>MeP)C<sub>6</sub>H<sub>4</sub>(Bpin)]OTf (0.050 g, 0.09 mmol) in 1

mL of MeOH was then treated with a solution of  $\text{KHF}_2$  (0.028 g, 0.36 mmol) in 1 mL  $\text{H}_2\text{O}$ . The resulting solution was sonicated for 15 minutes and the precipitate collected by filtration. The solid was washed with  $\text{H}_2\text{O}$  ( $3 \times 1$  mL) and dried *in vacuo* to yield 0.026 g (97 % yield) of *ortho*-( $\text{Ph}_2\text{MeP}$ ) $\text{C}_6\text{H}_4(\text{BF}_3)$  (**2**).  $^1\text{H}$  NMR (399.9 MHz,  $\text{CDCl}_3$ ):  $\delta$  2.89, (d, 3H, P- $\text{CH}_3$ ,  $^2J_{\text{H-P}} = 13.9$  Hz), 6.81 (dd, 1H,  $^3J_{\text{H-P}} = 15.1$  Hz,  $^3J_{\text{H-H}} = 7.8$  Hz), 7.19 (tdd, 1H,  $J = 7.69, 3.45, 1.33$  Hz), 7.41 (dd, 4H, *m*-phenyl- $\text{CH}$ ,  $J = 12.96, 7.88$  Hz), 7.55 (td, 4H, *o*-phenyl- $\text{CH}$ ,  $J = 8.13, 3.17$  Hz), 7.59 (td, 1H, phenyl- $\text{CH}$ ,  $J = 7.58, 1.87$  Hz), 7.68 (tq, 1H, phenyl- $\text{CH}$ ,  $J = 7.58, 1.68$  Hz), 8.15 (dd, 1H, phenyl- $\text{CH}$ ,  $J = 6.40, 7.58$  Hz).  $^{13}\text{C}$  NMR (100.5 MHz,  $\text{CDCl}_3$ ):  $\delta$  11.50 (d,  $^1J_{\text{P-C}} = 58.85$  Hz), 119.05 (d  $J_{\text{P-C}} = 86.98$  Hz), 123.62 (d  $J_{\text{P-C}} = 88.50$  Hz), 126.67 (d  $J_{\text{P-C}} = 14.49$  Hz), 129.63 (d  $J_{\text{P-C}} = 12.97$  Hz), 132.62 (d  $J_{\text{P-C}} = 9.91$  Hz), 133.43 (d  $J_{\text{P-C}} = 3.38$  Hz), 133.64 (d  $J_{\text{P-C}} = 3.03$  Hz), 134.16 (d  $J_{\text{P-C}} = 15.26$  Hz), 135.84 (dq  $^1J_{\text{P-C}} = 16.77$  Hz,  $^3J_{\text{F-C}} = 3.02$  Hz).  $^{11}\text{B}$  NMR (128.2 MHz,  $\text{CDCl}_3$ ):  $\delta$  3.68.  $^{19}\text{F}$  NMR (375.97 MHz,  $\text{CDCl}_3$ ):  $\delta$  -139.0.  $^{31}\text{P}$  NMR (161.75 MHz,  $\text{CDCl}_3$ ):  $\delta$  26.23. Anal. Calcd for  $\text{C}_{19}\text{H}_{17}\text{BF}_3\text{P}$ : C, 66.32; H, 4.98. Found: C, 65.62; H, 4.83.

### Preparation of *ortho*-( $\text{Me}_2\text{S}$ ) $\text{C}_6\text{H}_4(\text{BF}_3)$ (**3**)

To 2-bromothioanisole (2.0 g, 9.8 mmol) in diethyl ether (20 mL) was added *n*-BuLi (3.4 mL, 11.7 mmol, 2.9M in *n*-hexane) at 0 °C. After stirring the mixture for 1h at 0 °C, trimethylborate (1.32 mL, 11.8 mmol) was added dropwise to the lithiated compound at -78 °C. The mixture was allowed to warm to room temperature and stirred for 3 hours. The mixture was quenched with 3 M HCl (16 mL) and extracted with ethyl acetate (50 ml  $\times$  3). The organic layer was separated, dried over  $\text{MgSO}_4$  and filtered. The volatiles were removed *in vacuo* to give a white solid which was washed with hexanes

(20 mL) to afford 1.2 g of the crude boronic acid. The boronic acid *o*-(MeS)C<sub>6</sub>H<sub>4</sub>(B(OH)<sub>2</sub>) (0.2 g, 1.19 mmol) was treated with MeOTf (0.23 mL, 2.05 mmol) in dichloromethane (15 mL) at room temperature. The mixture was refluxed overnight and cooled to room temperature. The solvent was removed *in vacuo* yielding an off-white solid that was washed with diethyl ether to afford the sulfonium triflate [*o*-(Me<sub>2</sub>S)C<sub>6</sub>H<sub>4</sub>(B(OH)<sub>2</sub>)]OTf (0.28 g, yield 74%). <sup>1</sup>H-NMR (400 MHz, CD<sub>3</sub>CN): δ 3.10 (s, 6H, S-CH<sub>3</sub>), 7.71-7.80 (m, 2H, Ph-CH), 7.90 (d, 1H, Ph-CH, <sup>3</sup>J<sub>H-H</sub> = 8.0 Hz), 7.99 (d, 1H, Ph-CH, J = 7.2 Hz). <sup>11</sup>B-NMR (128 MHz, CD<sub>3</sub>CN): δ + 28.7. A solution of the sulfonium triflate [*ortho*-(Me<sub>2</sub>S)C<sub>6</sub>H<sub>4</sub>(B(OH)<sub>2</sub>)]OTf (0.20 g, 0.6 mmol) in acetonitrile (5 mL) was treated with solid KHF<sub>2</sub> (0.19 g, 2.4 mmol) and the mixture was stirred for 1 hour at room temperature. After filtration, the solvent was removed *in vacuo* to yield a white solid. The solid was washed with ethanol (40 ml) to afford *ortho*-(Me<sub>2</sub>S)C<sub>6</sub>H<sub>4</sub>(BF<sub>3</sub>) (0.078 g, yield 63%). <sup>1</sup>H-NMR (400 MHz, CD<sub>3</sub>CN): δ 3.04 (s, 6H, S-CH<sub>3</sub>), 7.50-7.56 (m, 2H, Ph-CH), 7.74 (d, 2H, Ph-CH, <sup>3</sup>J<sub>H-H</sub> = 8.0 Hz). <sup>13</sup>C NMR (100.5 MHz, CD<sub>3</sub>CN): 27.85, 125.16, 128.73, 132.01, 133.92. <sup>11</sup>B-NMR (128 MHz, CD<sub>3</sub>CN): δ + 3.14 (q, <sup>1</sup>J<sub>B-F</sub> = 43.7 Hz). <sup>19</sup>F NMR (375.97 MHz, CD<sub>3</sub>CN): δ -136.58 (q, <sup>1</sup>J<sub>B-F</sub> = 43.7 Hz). Anal. Calcd for C<sub>8</sub>H<sub>10</sub>BF<sub>3</sub>S: C, 46.64; H, 4.89; F, 27.66. Found: C, 46.46; H, 4.90; F, 27.46.

### **NMR Spectroscopic Kinetic Analyses**

Samples of **1** (5 mg), **2** (8.5 mg), and **3** (5 mg) were each dissolved in 0.2 mL CD<sub>3</sub>CN and 1.0 mL D<sub>2</sub>O phosphate buffer (pH 7.5, 500 mM). All of the resulting mixtures were filtered over glass wool to remove any precipitated solids. The <sup>19</sup>F NMR spectrum of each sample was collected periodically. Decomposition of the aryltrifluoroborate species was monitored by integration of the decreasing aryltrifluoroborate signal in conjunction with the increasing signal corresponding to free F<sup>-</sup> using VNMRJ Version 2.2 NMR processing software. The rate constants,  $k_{\text{obs}}$ , were calculated using a method reported in the literature.<sup>3</sup> The data used for these calculations is given in Table S2-S5.

**Table S2: Kinetic data for the hydrolysis of 1**

|                             |             | <u>Data for 1</u> |                          |                          |
|-----------------------------|-------------|-------------------|--------------------------|--------------------------|
|                             |             |                   |                          | k=6.30E-05               |
|                             |             |                   | exp. ratio               | calc. ratio              |
| <u>Time</u><br><u>(min)</u> | <u>[F-]</u> | <u>[BF3]</u>      | <u>[BF3]/([BF3]+[F])</u> | <u>[BF3]/([BF3]+[F])</u> |
| 0                           | 0           | 100               | 1.000                    | 1.000                    |
| 255                         | 2.82        | 100               | 0.973                    | 0.984                    |
| 450                         | 3.47        | 100               | 0.966                    | 0.972                    |
| 595                         | 4.86        | 100               | 0.954                    | 0.963                    |
| 740                         | 5.94        | 100               | 0.944                    | 0.954                    |
| 1330                        | 10.14       | 100               | 0.908                    | 0.920                    |
| 1660                        | 12.57       | 100               | 0.888                    | 0.901                    |
| 2790                        | 21.51       | 100               | 0.823                    | 0.839                    |
| 4350                        | 31.28       | 100               | 0.762                    | 0.760                    |
| 5700                        | 44.78       | 100               | 0.691                    | 0.698                    |
| 10155                       | 84.44       | 100               | 0.542                    | 0.527                    |
| 14460                       | 137.25      | 100               | 0.421                    | 0.402                    |
| 20000                       |             |                   |                          | 0.284                    |
| 30000                       |             |                   |                          | 0.151                    |
| 40000                       |             |                   |                          | 0.080                    |
| 50000                       |             |                   |                          | 0.043                    |



**Table S3: Kinetic data for the hydrolysis of 2**

|                             |             | <u>Data for 2</u> |                          |                          |
|-----------------------------|-------------|-------------------|--------------------------|--------------------------|
|                             |             |                   |                          | k=3.40E-06               |
|                             |             |                   |                          | exp. ratio               |
|                             |             |                   |                          | calc. ratio              |
| <u>Time</u><br><u>(min)</u> | <u>[F-]</u> | <u>[BF3]</u>      | <u>[BF3]/([BF3]+[F])</u> | <u>[BF3]/([BF3]+[F])</u> |
| 0                           | 0           | 100               | 1                        | 1                        |
| 1100                        | 0.25        | 100               | 0.997506234              | 0.996266985              |
| 2560                        | 0.81        | 100               | 0.991965083              | 0.99133377               |
| 4170                        | 1.21        | 100               | 0.98804466               | 0.985922035              |
| 5520                        | 2.67        | 100               | 0.973994351              | 0.981407022              |
| 9975                        | 4.46        | 100               | 0.957304231              | 0.966653667              |
| 14250                       | 5.3         | 100               | 0.949667616              | 0.952704973              |
| 19920                       | 7.24        | 100               | 0.932487878              | 0.934514627              |
| 24300                       | 7.97        | 100               | 0.926183199              | 0.920700947              |
| 40110                       | 13.77       | 100               | 0.878966336              | 0.87251625               |
| 50000                       |             |                   |                          | 0.843664817              |
|                             |             |                   |                          |                          |

**Table S4: Kinetic data for the hydrolysis of 3**

|                             |             | <u>Data for 3</u> |                          |                          |
|-----------------------------|-------------|-------------------|--------------------------|--------------------------|
|                             |             |                   |                          | k=1.20E-04               |
|                             |             |                   |                          | exp. ratio               |
|                             |             |                   |                          | calc. ratio              |
| <u>Time</u><br><u>(min)</u> | <u>[F-]</u> | <u>[BF3]</u>      | <u>[BF3]/([BF3]+[F])</u> | <u>[BF3]/([BF3]+[F])</u> |
| 0                           | 0           | 100               | 1.000                    | 1.000                    |
| 212                         | 2.88        | 100               | 0.972                    | 0.975                    |
| 308                         | 3.07        | 100               | 0.970                    | 0.964                    |
| 523                         | 6.12        | 100               | 0.942                    | 0.939                    |
| 688                         | 7.96        | 100               | 0.926                    | 0.921                    |
| 1430                        | 17.75       | 100               | 0.849                    | 0.842                    |
| 1650                        | 19.99       | 100               | 0.833                    | 0.820                    |
| 2857                        | 36.89       | 100               | 0.731                    | 0.710                    |
| 6000                        |             |                   |                          | 0.487                    |
| 9000                        |             |                   |                          | 0.340                    |
| 12000                       |             |                   |                          | 0.237                    |
| 15805                       | 607.15      | 100               | 0.141                    | 0.150                    |
| 20000                       |             |                   |                          | 0.091                    |
| 30000                       |             |                   |                          | 0.027                    |
| 40000                       |             |                   |                          | 0.008                    |
| 50000                       |             |                   |                          | 0.002                    |
|                             |             |                   |                          |                          |

**Table S4: Kinetic data for the hydrolysis of  $\text{PhBF}_3^-$**

|               |                   | Data for<br><b><math>\text{K}[\text{C}_6\text{H}_5\text{BF}_3]</math></b> |                                              |                                              |
|---------------|-------------------|---------------------------------------------------------------------------|----------------------------------------------|----------------------------------------------|
|               |                   |                                                                           |                                              | k = 0.0245                                   |
|               |                   |                                                                           |                                              | exp. ratio                                   |
|               |                   |                                                                           |                                              | calc. ratio                                  |
| Time<br>(min) | [F <sup>-</sup> ] | [BF <sub>3</sub> ]                                                        | $[\text{BF}_3]/([\text{BF}_3]+[\text{F}^-])$ | $[\text{BF}_3]/([\text{BF}_3]+[\text{F}^-])$ |
| 0             | 0                 | 100                                                                       | 1.000                                        | 1.000                                        |
| 15            | 44                | 100                                                                       | 0.694                                        | 0.692                                        |
| 30            | 105               | 100                                                                       | 0.488                                        | 0.480                                        |
| 45            | 197               | 100                                                                       | 0.337                                        | 0.332                                        |
| 60            | 335               | 100                                                                       | 0.230                                        | 0.230                                        |
| 75            | 531               | 100                                                                       | 0.158                                        | 0.159                                        |
| 90            | 841               | 100                                                                       | 0.106                                        | 0.110                                        |
|               |                   |                                                                           |                                              |                                              |
|               |                   |                                                                           |                                              |                                              |

## References

1. K. Albrecht, V. Kaiser, R. Boese, J. Adams and D. E. Kaufmann, *Perkin 2*, 2000, 2153-2157.
2. S. Porcel, G. Bouhadir, N. Saffon, L. Maron and D. Bourissou, *Angew. Chem. Int. Ed.*, 2010, released online.
3. R. Ting, C. W. Harwig, J. Lo, Y. Li, M. J. Adam, T. J. Ruth and D. M. Perrin, *J. Org. Chem.*, 2008, **73**, 4662-4670.
